# Supplementary material for: Urchin-like covalent organic frameworks templated Au@Ag composites for SERS detection of emerging contaminants
Source: Royal Society of Chemistry journal article supplement (doi:10.1039/d4cc02963a), 2024-01-01
Supplement: d4cc02963a1.pdf [file d4cc02963a1.pdf]

*Electronic Supplementary Information*

**Urchin-like Covalent Organic Frameworks Templated Au@Ag  
Composites for SERS Detection of Emerging Contaminants**

Xiaoya Yuan,<sup>a</sup> Weihua Wang,<sup>b</sup> Mantang Chen,<sup>c</sup> Lijin Huang,<sup>a</sup> Qin Shuai<sup>a</sup> and Lei Ouyang,<sup>\*a</sup>

<sup>a</sup> State Key Laboratory of Biogeology and Environmental Geology, Faculty of Materials Science and Chemistry, China University of Geosciences, Wuhan 430074, China.

<sup>b</sup> Hubei Key Laboratory of Resources and Eco-Environment Geology (Hubei Geological Bureau), Wuhan 430034, China

<sup>c</sup> Zhengzhou Tobacco Research Institute of CNTC, Zhengzhou 450001, China.

Experimental section, Table S1-S4, Fig. S1-S16 are included.

## Experimental Section

**Materials.** The chemicals and materials used in the experiment were all of analytic or chromatographic purity and used without further purification. 1,3,5-Tris (4-aminophenyl) benzene (TPB) and 2,5-divinylterephthaldehyde (DVA) were purchased from Shanghai Macklin Biochemical Technology Co., Ltd. Acetonitrile (ACN), Acetic Anhydride (HAc), Tetrahydrofuran (THF), Ethanol were purchased from China National Pharmaceutical Chemical Reagent Co., Ltd. Sodium citrate (SC) was purchased from Shanghai Aladdin Biochemical Technology Co., Ltd.

**Synthesis of UCOF.** TPB (0.04 mmol) and DVA (0.06 mmol) were dissolved in 5 mL of 92% ACN solution and sonicated for 5 minutes until the powder was completely dissolved. HAc (1.2 mL) was dropped into the solution under sonication, and reacted at room temperature for 72 hours. After the reaction was completed, washed the solid three times with THF and ethanol respectively, vacuum dry for 12 hours, grinded and stand-by for further use.

**Synthesis of UCOF-Au.** UCOF (2.5 mg) was dispersed in 1 mL of ultrapure water after sonication for 10 minutes. Different volumes (25, 50, 100, 200  $\mu\text{L}$ ) of  $\text{HAuCl}_4 \cdot 4\text{H}_2\text{O}$  (1%, w/w%) were slowly ( $0.2 \text{ mL min}^{-1}$ ) added into the UCOF dispersion while stirring. After reaction for 10 min, the UCOF-AuNPs were received.

**Synthesis of UCOF-Au@Ag.** Sodium citrate dihydrate (35 mg) was added to the prepared HCOF-Au dispersion. Calculating the required amount of  $\text{AgNO}_3$  based on the molar ratio of  $\text{HAuCl}_4 \cdot 4\text{H}_2\text{O}$  to  $\text{AgNO}_3$  at 1:40, 1:60, 1:80, 1:100, 1:120, 1:200. Then certain amount of  $\text{AgNO}_3$  ( $10 \text{ mmol L}^{-1}$ ) solution was added into the mixture with a rate of  $0.5 \text{ ml min}^{-1}$ . After reaction at  $70 \text{ }^\circ\text{C}$  for 1 hour, UCOF-Au@AgNPs were received.

## Materials characterization

Transmission electron microscopy (TEM) images were obtained from an Talos F200 xG2 TEM (Thermo Scientific, USA). The Brunauer–Emmett–Teller (BET) specific surface area characterization was performed on AutosorbiQ2 gas adsorption analyzer (Quantachrome, USA). X-ray diffraction (XRD) pattern was obtained with D8 Advance

25 X-ray diffractometer (Bruker, Germany). The adsorption capacity of the UCOF-Au@Ag for SMX was determined by detecting the residue concentration of SMX with a 1260 Infinity High Performance Liquid Chromatography (HPLC, Agilent, USA). The mobile phase was a mixture of 1 % HAc (63 %) and methanol (37 %).

### **Raman detection**

The target solution (or the dispersion, 0.5 mL) was mixed with an appropriate volume of the UCOF-Au@Ag NPs (0.5 mL), and the mixture was dropped onto a slide for Raman detection. The Raman spectra were received on a portable Raman spectrometer (Ocean Optics, USA). A laser at 785 nm was used as excitation source with a power of 100 mW, and exposure time was 1000 ms. For each sample, 20 times of detection were performed and averaged to get the averaged spectra.

### **FDTD simulation**

The electric field distribution of UCOF-Au@Ag nanostructures was simulated with FDTD method. The structure was build with a 250 nm core made from carbon, carbon nanotubes with length of 150 nm were randomly distributed on the surface of the core, simulating the structure of the UCOFs. Au@Ag NPs with Au core (10 nm) and Ag shell (50 nm) were generated on the structure randomly. In the calculation process, both x,y and z directions were set as perfectly matched layer conditions. The whole simulation area was divided into a 1 nm\*1 nm\*1 nm mesh to obtain accurate calculation results. A total field scattering field light source was employed as an excitation light source incident vertically onto the surface of the nanostructures. Finally, an electric field monitor was employed to obtain the electric field distribution in the x-y, x-z, and y-z planes.

### **Analytical Enhancement Factor Calculation**

The analytical SERS enhancement factor (AEF) value of UCOF-Au@Ag NPs for 4-MBA was estimated according to the following equation:

$$AEF = \frac{I_{SERS}}{I_{normal}} \times \frac{C_{normal}}{C_{SERS}}$$

$I_{\text{SERS}}$  is the intensity of the peak at  $1583\text{ cm}^{-1}$  in the SERS signal for 4-MBA.  $I_{\text{normal}}$  is the normal Raman intensity, which is 33.  $C_{\text{SERS}}$  is the concentration of 4-MBA in the Raman experiment ( $5 \times 10^{-7}\text{ mol L}^{-1}$ ) without surface-enhancement.  $C_{\text{normal}}$  is the concentration of 4-MBA in the SERS experiment ( $2 \times 10^{-3}\text{ mol L}^{-1}$ ).

The analytical enhancement factor of UCOF-Au@Ag NPs for 4-MBA was calculated to be  $7.0 \times 10^7$ .

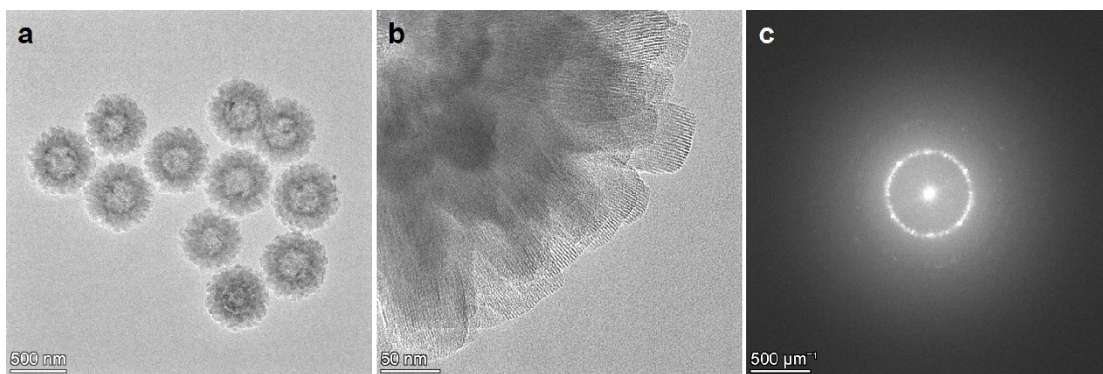

Fig. S1 (a) TEM image of UCOFs. (b) The high-resolution TEM image of UCOF. (c) SAED image of UCOF.

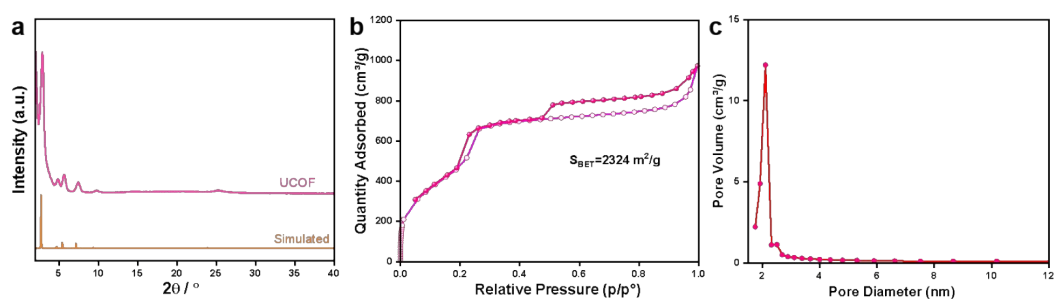

Fig. S2 (a) The XRD pattern of UCOFs. (b) The N<sub>2</sub> adsorption–desorption isotherms of UCOFs. (c) Pore size distribution profiles of UCOFs.

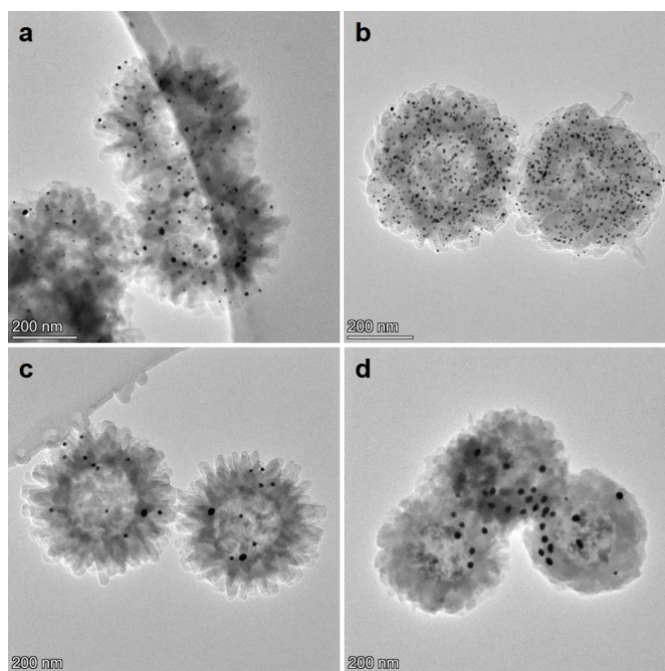

Fig. S3 The TEM images of UCOF-Au NPs after adding different concentrations of AuCl<sub>4</sub><sup>-</sup>. (a) 5 mmol L<sup>-1</sup>. (b) 10 mmol L<sup>-1</sup>. (c) 25 mmol L<sup>-1</sup>. (d) 50 mmol L<sup>-1</sup>.

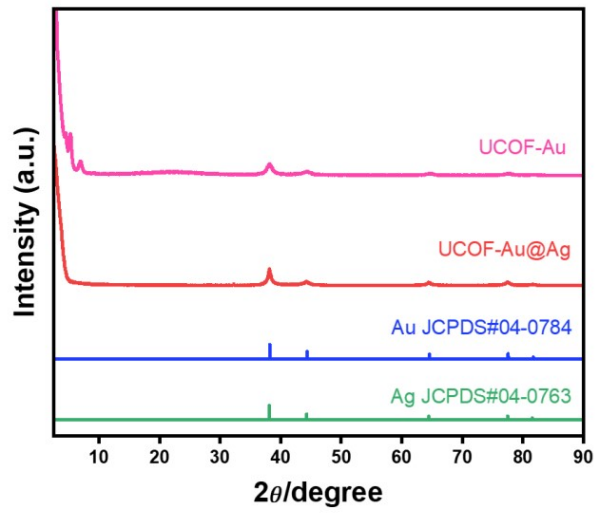

Fig.S4 The XRD pattern of UCOF-Au and UCOF-Au@AgNPs.

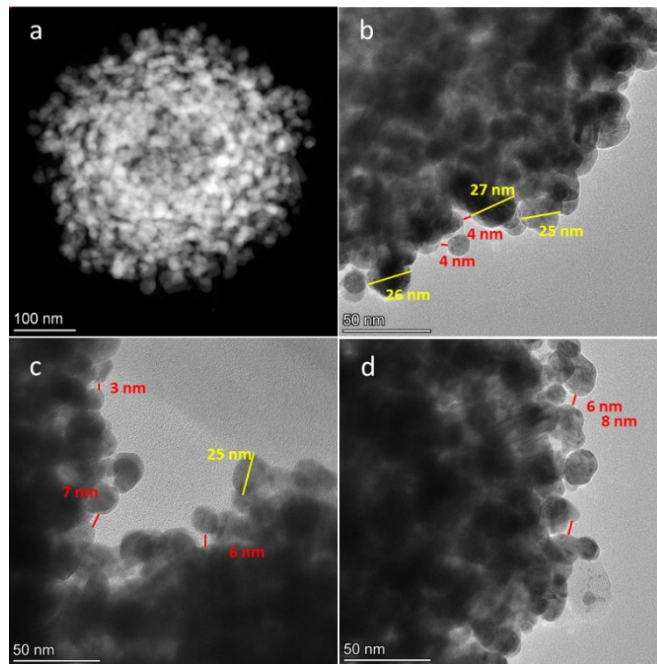

Fig.S5 (a) HAADF image of UCOF-Au@Ag. (b, c, d) The high-resolution TEM image of UCOF-Au@Ag.

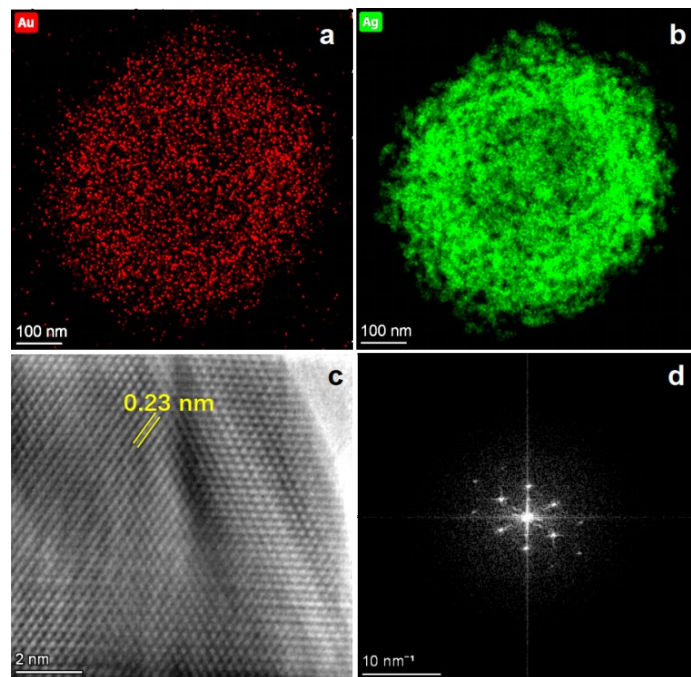

Fig.S6 (a,b) Au and Ag element mapping images of UCOF-Au@Ag. (c) The high-resolution TEM image of UCOF-Au@Ag. (d) SAED image of UCOF-Au@Ag.

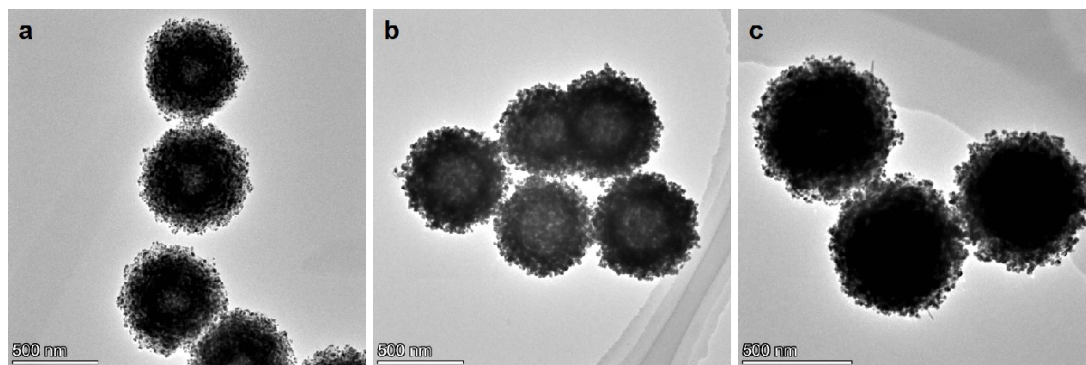

Fig.S7 TEM images of UCOF-Au@Ag at different molar ratios of Au:Ag. (a) 1:40, (b) 1:100, (c) 1:200.

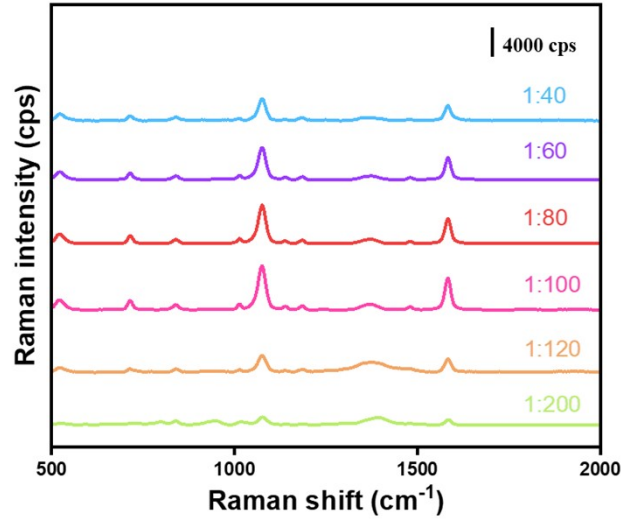

Fig.S8 The SERS spectra of 4-MBA with UCOF-Au@Ag NPs fabricated from different molar ratios of Au:Ag.

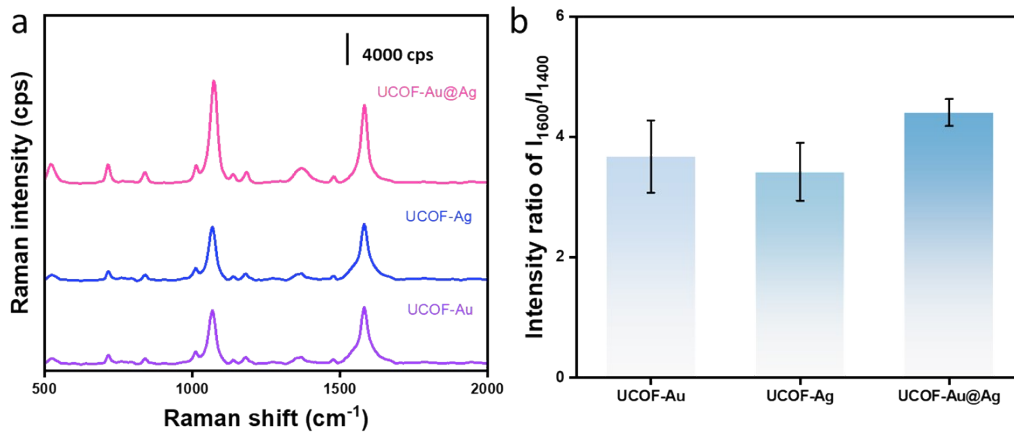

Fig.S9 (a) SERS performance comparison of different SERS substrates (UCOF-Au, UCOF-Ag and UCOF-Au@Ag, respectively). The total molar amounts of Au and Ag added to the UCOF for reduction are the same. (b) Reproducibility comparison of different substrates.



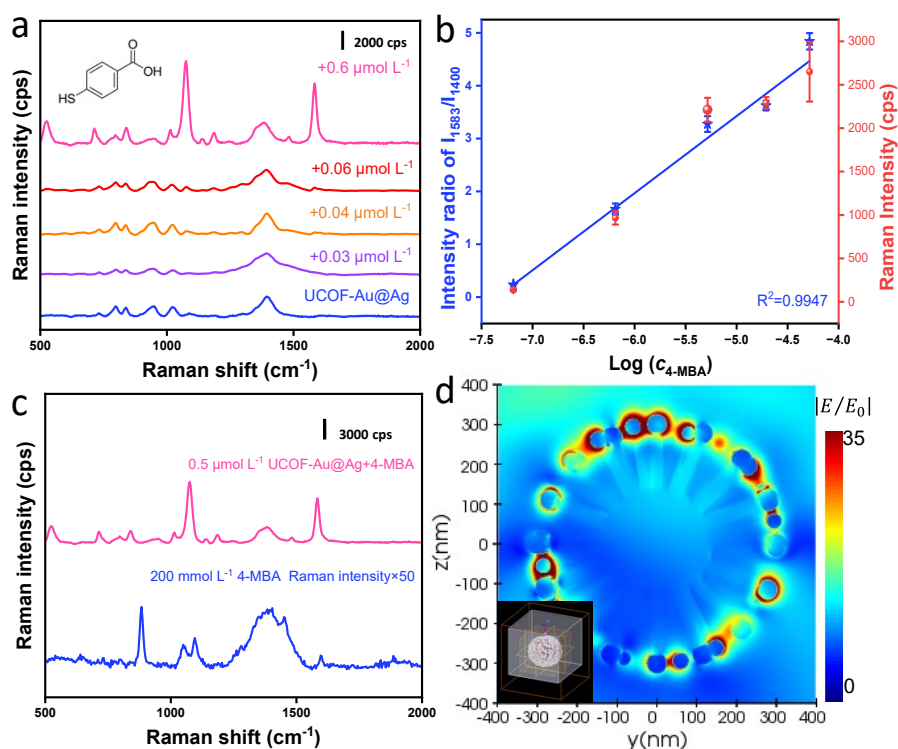

Fig.S10 (a) The SERS spectra of different concentrations of 4-MBA. (b) Radiometric peak intensities of  $I_{1583}/I_{1400}$  versus logarithmic concentration of 4-MBA ( $C_{4\text{-MBA}}$ ). (c) Analytical Enhancement factor calculation of UCOF-Au@Ag for 4-MBA. (d) The simulated electromagnetic field distribution on UCOF-Au@Ag with 3D-FDTD method.

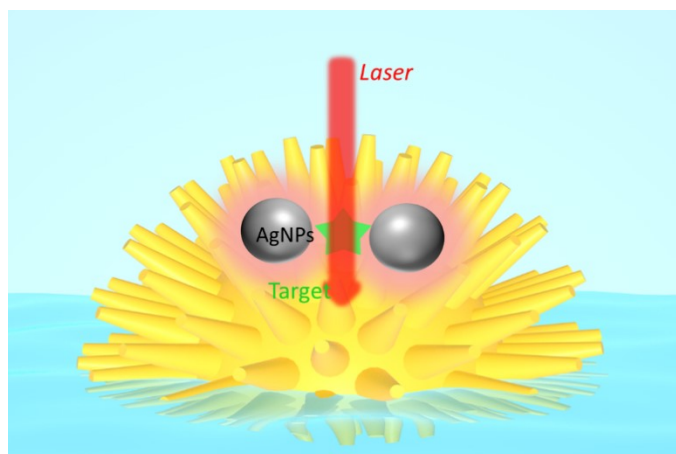

Fig.S11 Schematic of the SERS detection and the work principle of signal normalization.

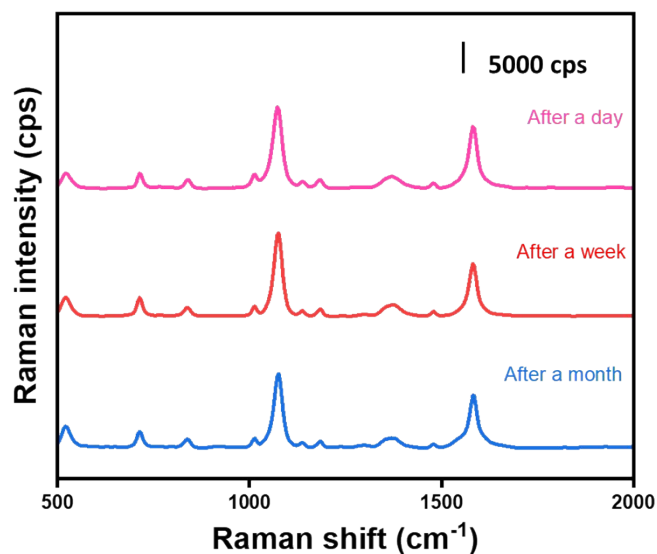

Fig.S12 The stability of the UCOF-Au@Ag substrate after storage for different periods of time.

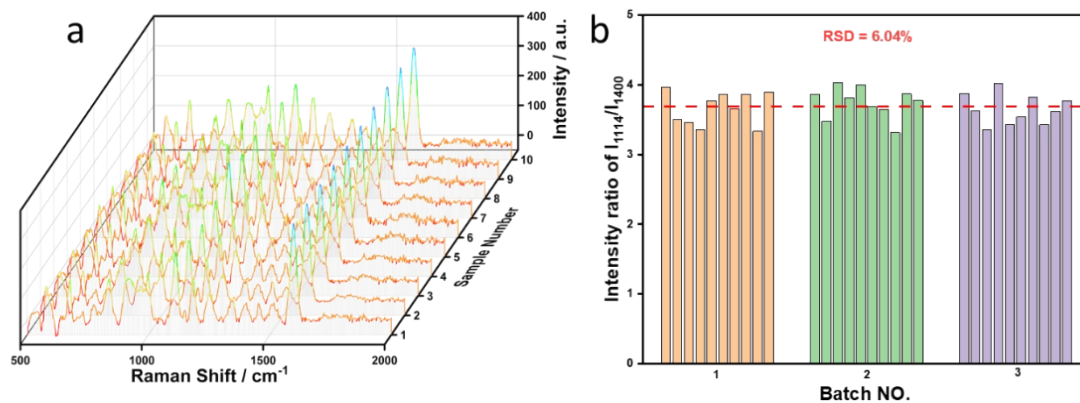

Fig.S13 (a) SERS spectra of SMX (4 μmol L<sup>-1</sup>) recorded at 10 randomly chosen spots. (b) The peak ratio of I<sub>1114</sub>/I<sub>1400</sub> of 4 μmol L<sup>-1</sup> SMX on different batches of substrates, the RSD of the peak ratio of I<sub>1114</sub>/I<sub>1400</sub> was calculated to 6.04%.

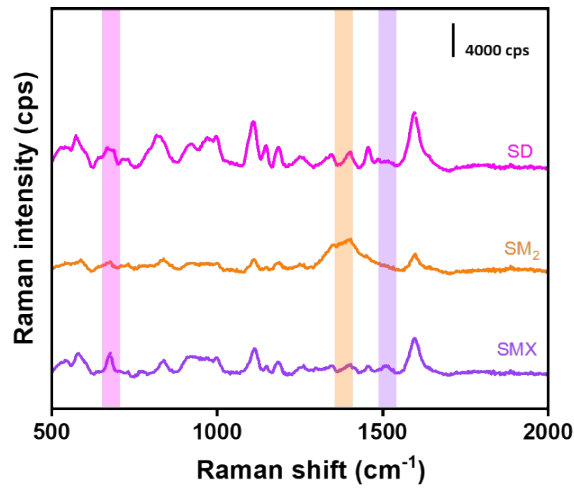

Fig.S14 The fingerprint spectra of sulfonamide antibiotics ( $4 \mu\text{mol L}^{-1}$ ). Sulfadiazine (SD), Sulfamethazine ( $\text{SM}_2$ ), Sulfamethoxazole (SMX).

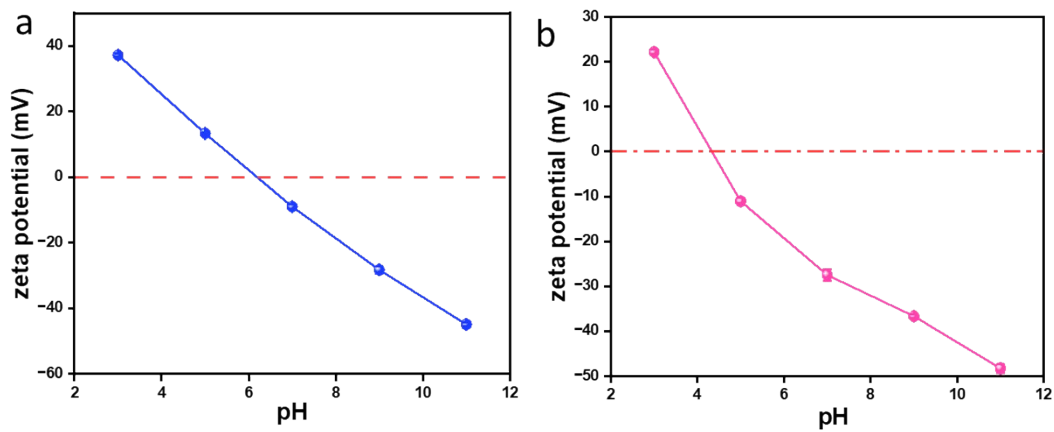

Fig.S15 The zeta potential of (a) UCOF, (b) UCOF-Au@Ag.

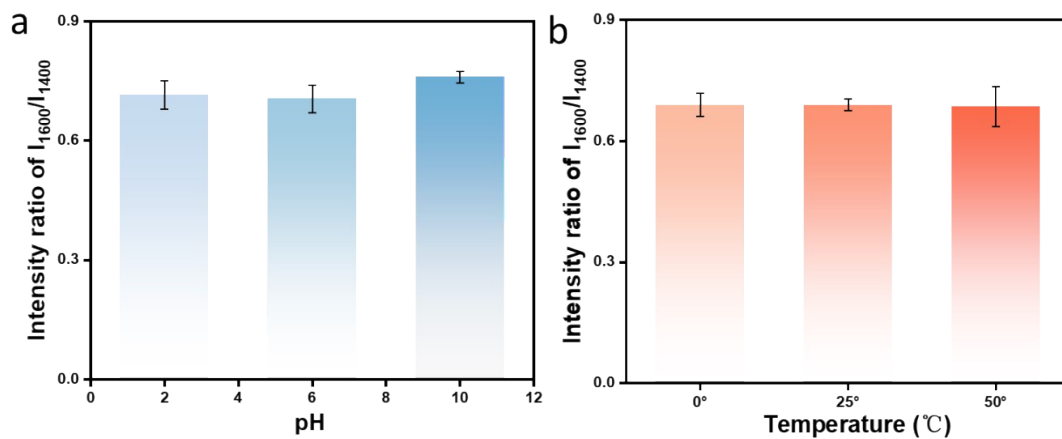

Fig.S16 Effect of (a) pH and (b) temperature on the detection of nanoplastic PS ( $10 \text{ mg L}^{-1}$ ).

Table S1 Assignment of Surface-enhanced Raman peaks of SAs.<sup>16</sup>

|                  | SERS (cm <sup>-1</sup> ) | Attribution of characteristic peak                             |
|------------------|--------------------------|----------------------------------------------------------------|
| Sulfadiazine     | 544                      | $\pi(\text{ring}) + \omega(\text{NH}_2) + \omega(\text{SO}_2)$ |
|                  | 574                      | $\delta(\text{SO}_2)$                                          |
|                  | 644                      | $\omega(\text{NH}_2)$                                          |
|                  | 670                      | $\varepsilon(\text{CSN})$                                      |
|                  | 713                      | $\theta(\text{ring})$                                          |
|                  | 817                      | $\delta(\text{ring})$                                          |
|                  | 1112                     | $\varepsilon(\text{SO}_2)$                                     |
|                  | 1181                     | $\delta(\text{CH})$                                            |
|                  | 1249                     | $\delta(\text{CN})$                                            |
|                  | 1594                     | $\varepsilon(\text{ring})$                                     |
| Sulfamethazine   | 589                      | $\delta(\text{SO}_2)$                                          |
|                  | 836                      | $\delta(\text{ring})$                                          |
|                  | 1001                     | $\pi(\text{CH}) + \delta(\text{CN})$                           |
|                  | 1115                     | $\varepsilon(\text{SO}_2)$                                     |
|                  | 1597                     | $\varepsilon(\text{ring})$                                     |
| Sulfamethoxazole | 540                      | $\pi(\text{ring}) + \omega(\text{NH}_2) + \omega(\text{SO}_2)$ |
|                  | 580                      | $\delta(\text{SO}_2)$                                          |
|                  | 670                      | $\pi(\text{CS}) + \pi(\text{CN})$                              |
|                  | 838                      | $\delta(\text{ring})$                                          |
|                  | 1001                     | $\pi(\text{CH}) + \delta(\text{CN})$                           |
|                  | 1114                     | $\varepsilon(\text{SO}_2)$                                     |
|                  | 1185                     | $\varepsilon(\text{SO}_2)$                                     |
|                  | 1250                     | $\delta(\text{CN})$                                            |
|                  | 1511                     | $\varepsilon(\text{ring})$                                     |
|                  | 1597                     | $\varepsilon(\text{ring})$                                     |

$\varepsilon$ , stretching vibration;  $\delta$ , inplane bending vibration;  $\pi$ , out-of-plane bending vibration;  $\omega$ , non-planar rocking vibration;  $\theta$ , breathing vibration.

Table S2 Comparison of different SERS-based sulfamethoxazole detection methods

| SERS method                                                                   | Target analyte         | LOD mol L <sup>-1</sup> | Refs      |
|-------------------------------------------------------------------------------|------------------------|-------------------------|-----------|
| CS/CN/Ag                                                                      | Sulfamethoxazole       | 7.46×10 <sup>-9</sup>   | [1]       |
| TopUp Plasmonic Arrays                                                        | Sulfamethoxazole       | 10 <sup>-7</sup>        | [2]       |
| Gold nanoparticles-decorated violet phosphorene                               | Sulfamethazine         | 1.7×10 <sup>-8</sup>    | [3]       |
| Au@g-C <sub>3</sub> N <sub>4</sub> NS                                         | Sulfamethazine         | 1.0×10 <sup>-13</sup>   | [4]       |
| Magnetic Ti <sub>3</sub> C <sub>2</sub> Tx/Fe <sub>3</sub> O <sub>4</sub> /Ag | Phthalic sulfathiazole | 2.2×10 <sup>-7</sup>    | [5]       |
| Ag-TiO <sub>2</sub> @MIPs                                                     | Sulfamethazine         | 3.6×10 <sup>-9</sup>    | [6]       |
| A Janus-labeled Au nanoparticle                                               | Sulfamethazine         | 3.6×10 <sup>-9</sup>    | [7]       |
| Flexible silver ring                                                          | Sulfonamide            | 9.3×10 <sup>-8</sup>    | [8]       |
| UCOF-Au@Ag                                                                    | Sulfamethoxazole       | 7.7×10 <sup>-9</sup>    | This work |

Table S3 Assignment of Surface-enhanced Raman peaks of nanoplastics.<sup>17,18</sup>

|      | SERS (cm <sup>-1</sup> ) | Attribution of characteristic peak |
|------|--------------------------|------------------------------------|
| PS   | 1002                     | θ(ring)                            |
|      | 1035                     | δ(CH)                              |
|      | 1600                     | ε(ring)                            |
| PMMA | 1075                     | ε(CC)                              |
|      | 1431                     | δ(CH)                              |
|      | 1581                     | ε(ring)                            |

Table S4 Comparison of different SERS-based nanoplastics detection methods

| SERS method                                  | Nanoplastics size | LOD mg L <sup>-1</sup> | Refs      |
|----------------------------------------------|-------------------|------------------------|-----------|
| AuNPs-decorage sponge                        | 80 nm             | 1                      | [9]       |
| AuNPs                                        | 350 nm            | 6.5                    | [10]      |
| Hydrophobicity-driven self-assembly of AgNPs | 100 nm            | 1                      | [11]      |
| Gold nanostars                               | 33 nm             | 1.25                   | [12]      |
| Mesoporous spike Au Membranes                | 20 nm             | 0.1                    | [13]      |
| Au-sputtered glass slide cover               | 100 nm            | 0.26                   | [14]      |
| SiO <sub>2</sub> PC@Ag                       | 200 nm            | 5                      | [15]      |
| UCOF-Au@Ag                                   | 30 nm             | 0.029                  | This work |

## Reference

1. M. Luo, L. Qin, J. Tao, X. Gao, T. Zhang, S.-Z. Kang and X. Li, *Journal of Hazardous Materials*, 2023, 459, 132131.
2. S. Patze, U. Huebner, K. Weber, D. Cialla-May and J. Popp, *Advanced Materials Interfaces*, 2016, 3, 1600549.
3. K. Ji, P. Liu, C. Wu, Q. Li, Y. Ge, Y. Wen, J. Xiong, X. Liu, P. He, K. Tang and L. Bai, *Sensors and Actuators B: Chemical*, 2023, 386, 133736.
4. Y. Lu, C. Li, Y. Wang, C. Liu, Z. Wang, J. Liu, H. Fan, Z. Feng and T. Sun, *Water Research*, 2024, 253, 121307.
5. Z. Yu, L. Huang, Z. Zhang and G. Li, *Chinese Chemical Letters*, 2022, 33, 3853-3858.
6. X. Ren, L. Yang, Y. Li and X. Li, *Applied Surface Science*, 2021, 544, 148879.
7. Y. Wang, M. Zou, Y. Chen, F. Tang, J. Dai, Y. Jin, C. Wang and F. Xue, *Talanta*, 2024, 267, 125208.
8. Q. Shao, X. Zhang, P. Liang, Q. Chen, X. Qi and M. Zou, *Applied Surface Science*, 2022, 596, 153550.
9. R. Yin, H. Ge, H. Chen, J. Du, Z. Sun, H. Tan and S. Wang, *Environmental Advances*, 2021, 5, 100096.
10. L. Mikac, I. Rigó, L. Himics, A. Tolić, M. Ivanda and M. Veres, *Applied Surface Science*, 2023, 608, 155239.
11. D. Li, X. Tian, W. Yang, X. Wang, Y. Liu and J. Shan, *Chemosphere*, 2023, 339, 139775.
12. J. Caldwell, P. Taladriz-Blanco, L. Rodriguez-Lorenzo, B. Rothen-Rutishauser and A. Petri-Fink, *Environmental Science: Nano*, 2024, 11, 1000-1011.
13. Y. Qin, J. Qiu, N. Tang, Y. Wu, W. Yao and Y. He, *Environmental Research*, 2023, 228, 115926.
14. B. Chaisrihwun, S. Ekgasit and P. Pienpinijtham, *Journal of Hazardous Materials*, 2023, 442, 130046.
15. L. Chang, S. Jiang, J. Luo, J. Zhang, X. Liu, C.-Y. Lee and W. Zhang, *Environmental Science: Nano*, 2022, 9, 542-553.
16. Z.-m. Zhou, H. Zheng, T. Liu, Z.-z. Xie, S.-h. Luo, G.-y. Chen, Z.-q. Tian and G.-k. Liu, *Analytical Chemistry*, 2021, 93, 8603-8612.
17. M. Matamoros-Ambrocio, E. Sánchez-Mora and E. Gómez-Barojas, *Polymers*, 2023, 15.
18. L. Chang, S. Bai, P. Wei, X. Gao, J. Dong, B. Zhou, C. Peng, J. Jia and T. Luan, *Talanta*, 2024, 273, 125859.
